# Supplementary material for: Polyfluorene-based white light conjugated polymers incorporating orange iridium(iii) complexes: the effect of steric configuration on their photophysical and electroluminescent properties
Source: Royal Society of Chemistry journal article supplement (doi:10.1039/c7ra11204a), 2018-01-01
Supplement: c7ra11204a1.pdf [file c7ra11204a1.pdf]

## Polyfluorene-based white light conjugated polymers incorporating orange iridium(III) complexes: Effect of steric configuration on their photophysical and electroluminescent properties

Jing Sun<sup>a,b,\*</sup>, Dongyu Wu<sup>a,b</sup>, Long Gao<sup>a,b</sup>, Guojing Lu<sup>a,b</sup>, Jie Li<sup>a,b</sup>, Xinwen Zhang<sup>c,\*\*</sup>, Yanqin Miao<sup>a,b</sup>, Hua Wang<sup>a,b,\*\*\*</sup>, Bingshe Xu<sup>a,b</sup>

<sup>a</sup> Key Laboratory of Interface Science and Engineering in Advanced Materials, Taiyuan University of Technology, Ministry of Education, Taiyuan 030024, P. R. China. E-mail address: [sunjing@tyut.edu.cn](mailto:sunjing@tyut.edu.cn); [wanghua001@tyut.edu.cn](mailto:wanghua001@tyut.edu.cn)

<sup>b</sup> Research Center of Advanced Materials Science and Technology, Taiyuan University of Technology, Taiyuan 030024, P. R. China

<sup>c</sup> Key Laboratory for Organic Electronics & Information Displays, Nanjing University of Posts and Telecommunications, Nanjing 210023, P. R. China. E-mail address: [iamxwzhang@njupt.edu.cn](mailto:iamxwzhang@njupt.edu.cn)

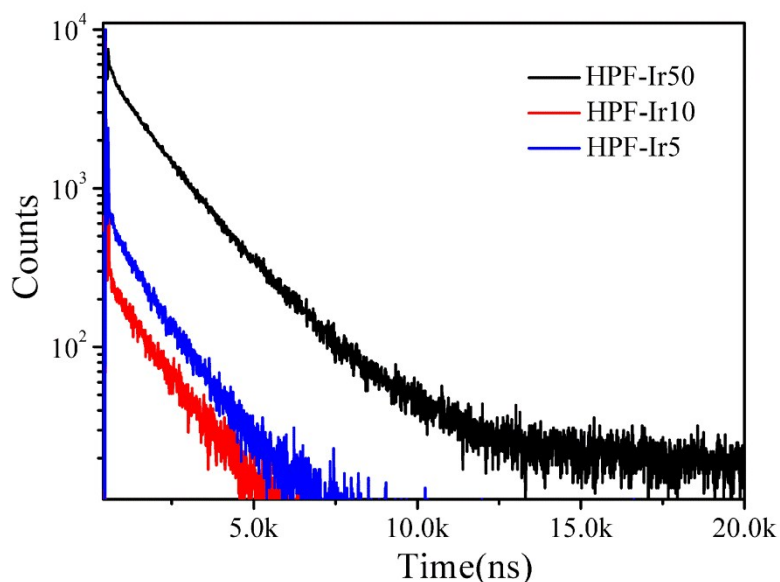

Fig. S1 The lifetime decay curves of the hyperbranched polymer films.

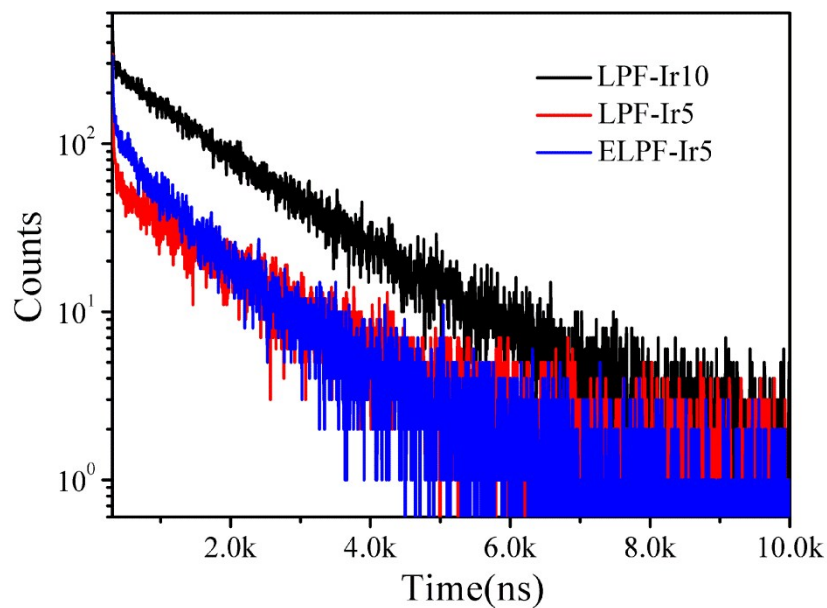

Fig. S2 The lifetime decay curves of the linear polymer films.

Table S1 The detailed data of fluorescence lifetime.

| Polymers | $\tau_1$ (ns) | $\tau_2$ (ns) | $\chi^2$ | $\tau_{\text{average}}$ (ns) |
|----------|---------------|---------------|----------|------------------------------|
| HPF-Ir50 | 562           | 1819          | 1.277    | 1656                         |
| HPF-Ir10 | 499           | 1674          | 1.026    | 1536                         |
| HPF-Ir5  | 561           | 1578          | 1.179    | 1554                         |
| LPF-Ir10 | 1480          | -             | 1.098    | 1480                         |
| LPF-Ir5  | 1358          | -             | 1.249    | 1358                         |
| ELPF-Ir5 | 938           | -             | 1.153    | 938                          |
